# Supplementary material for: Glycosylation in the tumor immune response: the bitter side of sweetness: Glycosylation in the tumor immune response
Source: PubMed Central journal article supplement (PMC11399423; doi:10.3724/abbs.2024107), 2024-06-28
Supplement: summary_graph.pdf [file summary_graph.pdf]

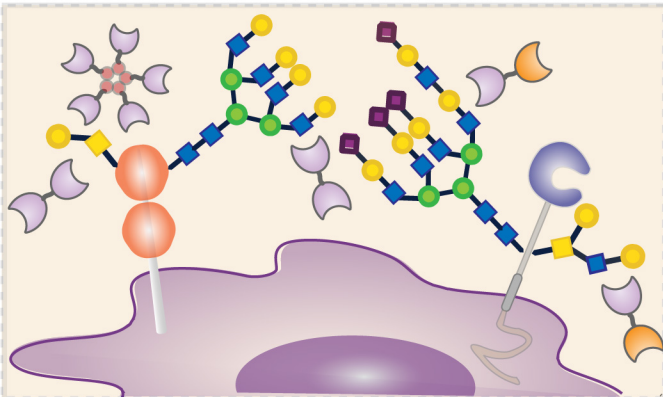

Galectin-glycan interaction

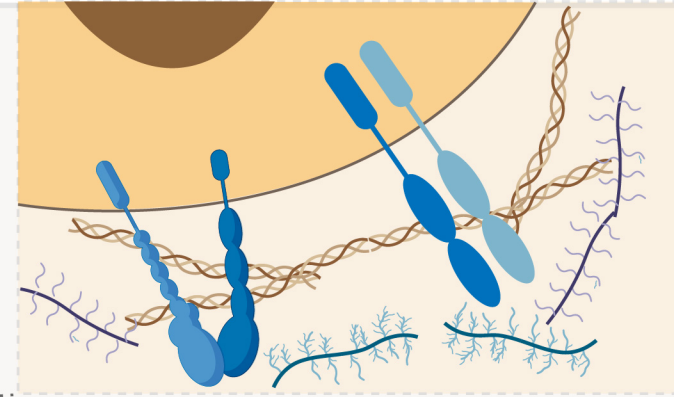

ECM-receptor interaction

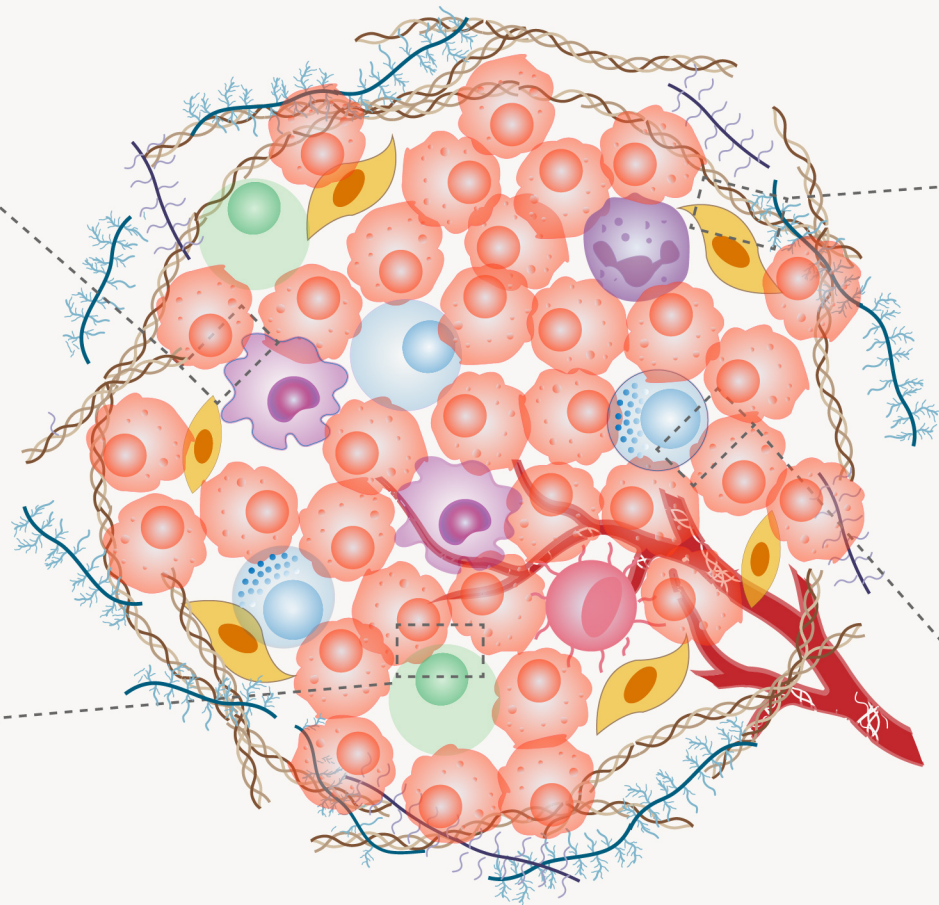

Tumor microenvironment

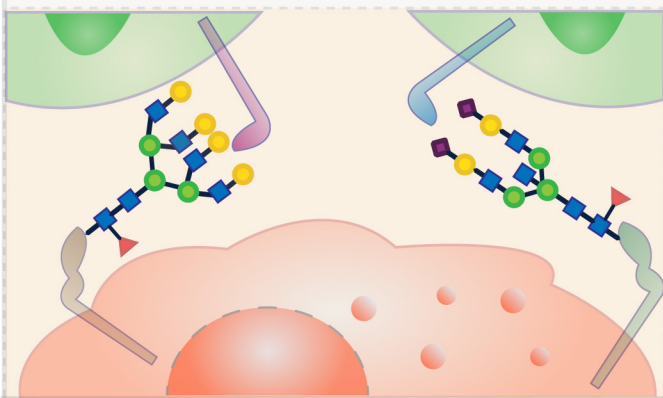

B7 family glycosylation

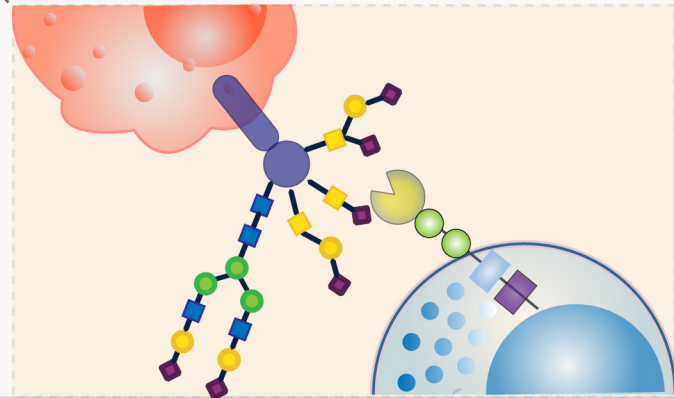

Siglec-sialic acid interaction

- |                                                                                   |                                                                                     |                                                                                     |                                                                                      |                                                                                       |                                                                                       |
|-----------------------------------------------------------------------------------|-------------------------------------------------------------------------------------|-------------------------------------------------------------------------------------|--------------------------------------------------------------------------------------|---------------------------------------------------------------------------------------|---------------------------------------------------------------------------------------|
|  |  |  |  |  |  |
| Fibroblast                                                                        | NK cell                                                                             | Tumor cell                                                                          | Dendritic cell                                                                       | Hyaluronic acid                                                                       | Blood vessel                                                                          |
|  |  |  |  |  |  |
| Macrophage                                                                        | T cell                                                                              | Neutrophil                                                                          | Endothelial cell                                                                     | Collagen                                                                              | Proteoglycan                                                                          |
